# Supplementary material
Source: Springer Nature journal article supplement (https://www.springermedizin.de/resource/supplementary/13229_2012_48_MOESM1_ESM.pdf/9676058)
Supplement: MOESM1 [file 9676058]

| MNI coordinates       |     |     | P-value<br>(FWE-corrected) | Z-score | Cluster size | Region                                             |
|-----------------------|-----|-----|----------------------------|---------|--------------|----------------------------------------------------|
| x                     | y   | z   |                            |         |              |                                                    |
| <b>CT &gt; EFT</b>    |     |     |                            |         |              |                                                    |
| <b>Control group:</b> |     |     |                            |         |              |                                                    |
| 58                    | -58 | 28  | <0.001                     | >8      | 6815         | RIPC, right STS, right MTG, right hippocampal body |
| -44                   | -62 | 26  | <0.001                     | >8      | 7450         | LIPC, left STS, left MTG                           |
| -4                    | -56 | 28  | <0.001                     | >8      | 4705         | PCC                                                |
| 30                    | -82 | -32 | <0.001                     | 7.13    | 54           | Right cerebellar hemisphere                        |
| 0                     | 40  | -16 | <0.001                     | 7.10    | 4283         | VACC, bilateral VMPFC, bilateral DMPFC             |
| -52                   | 30  | -8  | 0.001                      | 5.16    | 135          | Left VLPFC                                         |
| -24                   | -16 | -18 | 0.001                      | 5.15    | 73           | Left hippocampal body                              |
| <b>Sibling group:</b> |     |     |                            |         |              |                                                    |
| -44                   | -62 | 26  | <0.001                     | >8      | 2710         | LIPC, left ITG, left postcentral gyrus             |
| 56                    | -58 | 26  | <0.001                     | 7.78    | 2444         | RIPC, right postcentral gyrus                      |
| -6                    | -58 | 28  | <0.001                     | 7.33    | 2544         | PCC                                                |
| -12                   | 60  | 18  | <0.001                     | 6.34    | 2751         | VACC, bilateral VMPFC, bilateral DMPFC             |
| -42                   | 4   | -32 | <0.001                     | 6.23    | 957          | Left MTG                                           |
| 30                    | -82 | -32 | <0.001                     | 6.22    | 19           | Right cerebellar hemisphere                        |
| 60                    | -10 | -24 | <0.001                     | 5.34    | 500          | Right MTG                                          |
| 10                    | 56  | 30  | 0.009                      | 4.71    | 45           | Right DMPFC                                        |
| 68                    | -44 | -4  | 0.035                      | 4.37    | 11           | Right ITG                                          |
| <b>Autism group:</b>  |     |     |                            |         |              |                                                    |
| 60                    | -60 | 28  | <0.001                     | 6.29    | 494          | RIPC                                               |
| -4                    | -60 | 30  | <0.001                     | 6.14    | 982          | PCC                                                |
| -46                   | -64 | 28  | <0.001                     | 5.97    | 814          | LIPC                                               |
| -66                   | -42 | 28  | 0.001                      | 5.13    | 81           | Left STS                                           |
| -14                   | 64  | 16  | 0.006                      | 4.79    | 40           | Left DMPFC                                         |
| 58                    | -24 | 22  | 0.014                      | 4.60    | 33           | Right STS                                          |

**Supplementary Table 1** Main deactivations to Embedded Figures versus control task. Brain regions activated significantly more strongly to control task versus Embedded Figures Task, corresponding MNI coordinates, cluster sizes, Z-scores and P-values. All analyses are corrected for multiple comparisons, and P-values are expressed following whole brain level family-wise error (FWE) correction at the threshold of  $P < 0.05$ . MNI – Montreal Neuroimaging Institute; CT – control task; EFT – Embedded Figures Task; RIPC – right inferior parietal cortex; STS – superior

temporal sulcus; MTG – middle temporal gyrus; LIPC – left inferior parietal cortex; PCC – posterior cingulate cortex; VACC – ventral anterior cingulate cortex; VMPFC – ventromedial prefrontal cortex; DMPFC – dorsomedial prefrontal cortex; VLPFC – ventrolateral prefrontal cortex; ITG – inferior temporal gyrus.
